# Supplementary material
Source: PubMed Central journal article supplement (PMC5681996)
Supplement: NIHMS917750-supplement-1.pdf [file NIHMS917750-supplement-1.pdf]

Figure S1

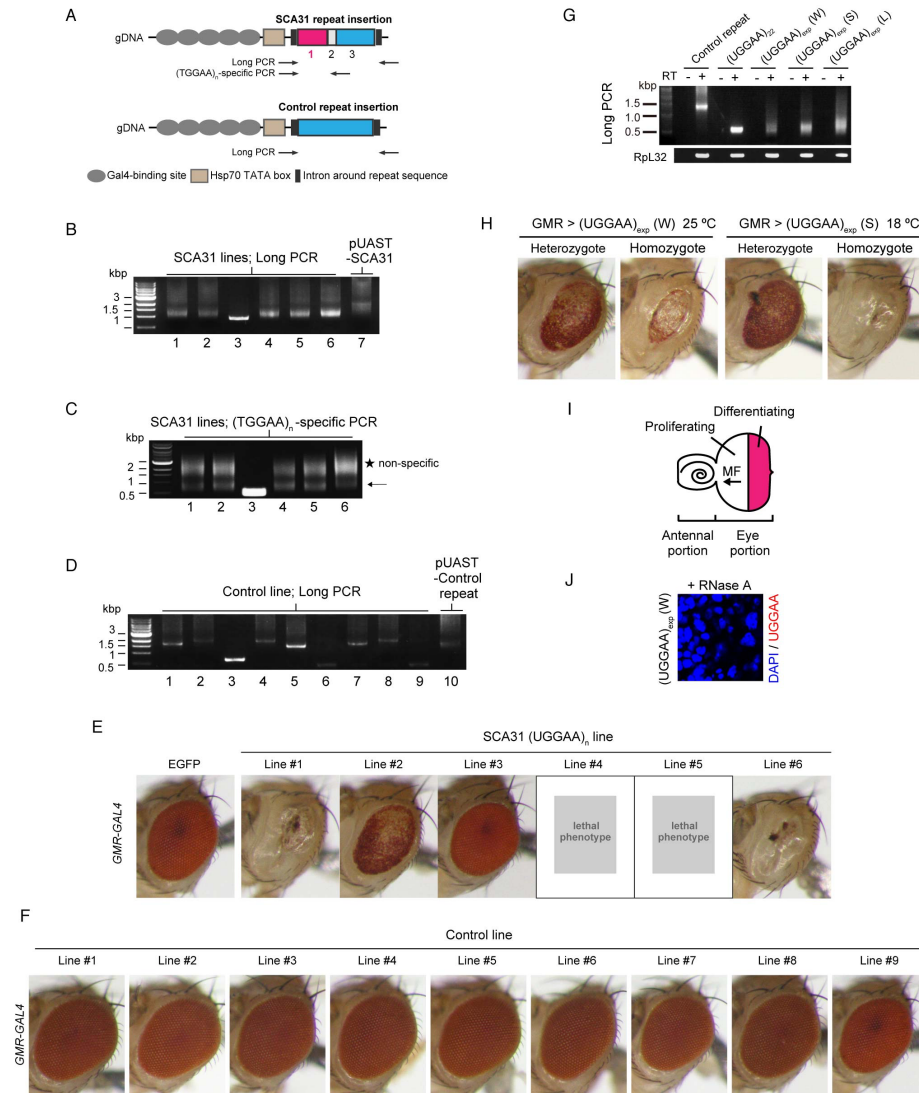

**Figure S1. Characterization of the fly lines, Related to Figure 1**

(A) Schematic of the constructs and positions of the two primer sets for SCA31 and control fly lines. (B–D) Estimation of the size of the insertion fragments (B, D) and the SCA31-specific TGGAA repeat sequence (arrow in C, magenta in A), by long PCR and TGGAA-specific PCR, respectively. (E) Light microscopy images of compound eyes from *Drosophila* expressing EGFP (control), line #1 (strong expression), line #2 (weak expression), line #3 (22 repeats) and line #6 (strong expression) using *GMR-Gal4*. Lines #4 and #5 were pupal lethal. (F) Light microscopy images of compound eyes of control repeat fly lines (Control #1–9). (G) Reverse-transcription PCR analysis of transgene expression of the transgenic fly lines. Rpl32 was used as an internal standard. (H) Images of the disrupted eye morphology of homozygous and heterozygous UGGAA<sub>exp</sub> (W) flies at 25 °C and UGGAA<sub>exp</sub> (S) flies at 4 °C. Genotypes: heterozygote: *GMR-GAL4/y*; *UAS-UGGAA<sub>exp</sub>* (W)/*UAS-EGFP*; homozygote: *GMR-GAL4/y*; *UAS-UGGAA<sub>exp</sub>* (W)/*UAS-UGGAA<sub>exp</sub>* (W); heterozygote: *GMR-GAL4/y*; *UAS-UGGAA<sub>exp</sub>* (S)/*UAS-EGFP*; and homozygote: *GMR-GAL4/y*; *UAS-UGGAA<sub>exp</sub>* (S)/*UAS-UGGAA<sub>exp</sub>* (S). (I) Schematic of the eye imaginal fly disc. Photoreceptor differentiation occurred in the eye imaginal discs of third-instar larvae, and the *GMR-GAL4* system drives transgene expression only in the differentiating photoreceptors. (J) Specificity of the FISH probe was confirmed by treatment of the tissues with RNase, which diminished RNA foci.

## Figure S2

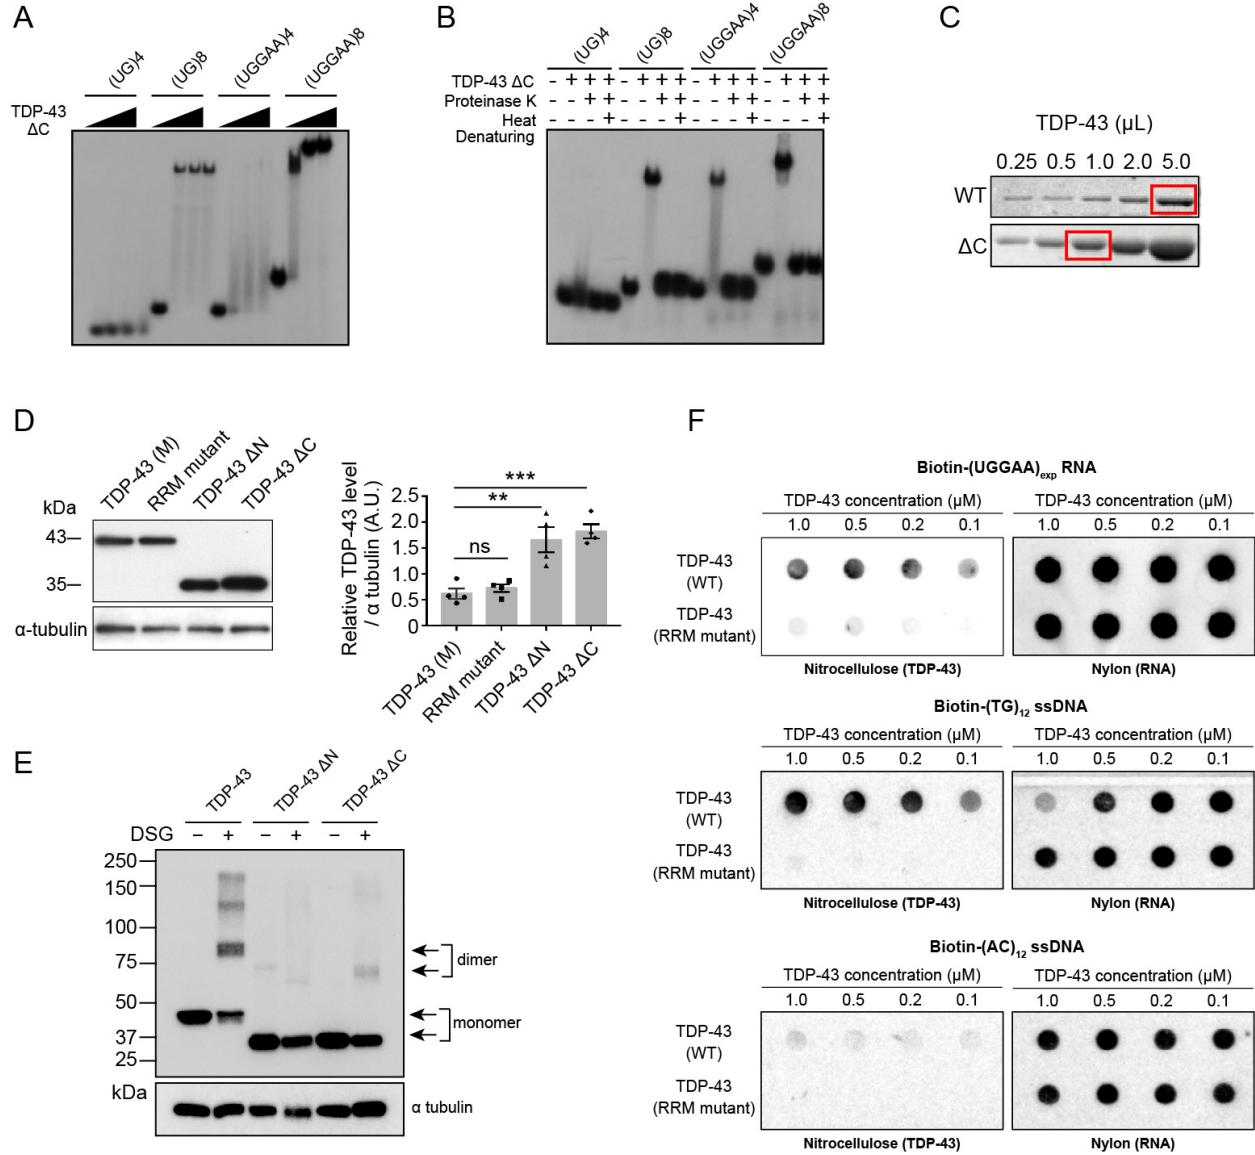

**Figure S2. Expression of TDP-43 variants, Related to Figure 2 and 3**

(A) Binding of RNA oligonucleotides to increasing amounts of TDP-43  $\Delta C$ . (B) Heat denaturation and/or proteinase K treatment abolishes TDP-43  $\Delta C$  binding to RNA oligos, which then comigrate with unbound RNA. Human recombinant TDP-43 WT and TDP-43  $\Delta C$  and [ $\gamma$ -<sup>32</sup>P] ATP end-labeled r(UG)<sub>n</sub> and r(UGGAA)<sub>n</sub> (where n=4 or 8) were incubated for 30 min at room temperature in buffer containing 10 mM Tris pH 8, 10 mM NaCl, 2 mM MgCl<sub>2</sub>, 5% glycerol and 1 mM DTT. Where indicated, proteinase K (2  $\mu g/\mu L$ ) was added and incubated for 10 min at 37 °C and heat denaturing was performed for 2 min at 85 °C. Samples were run on a 6% polyacrylamide gel for 2 h at 120 V (9 V/cm). (C) Relative amounts of TDP-43 WT & TDP-43  $\Delta C$  were standardized in EMSAs using SDS-PAGE gels with Coomassie staining to determine that TDP-43  $\Delta C$  should be diluted 1:5 prior to the binding experiments, as indicated by the red boxes. (D) Immunoblots showing the expression of TDP-43 variants in the fly lines. Data are presented as mean  $\pm$  SEM,  $p = 0.0001$ , one-way ANOVA, \*\* $p < 0.01$ , \*\*\* $p < 0.001$ , Dunnett's *post hoc* analysis; n.s. indicates no significant difference.

(E) The five fly heads were treated with DSG, a homobifunctional NHS-ester crosslinking reagent used to study native protein structures. Immunoblot analysis revealed that TDP-43 in noncrosslinked fly tissues expressing TDP-43 WT,  $\Delta C$  or  $\Delta N$  migrates at a speed corresponding to the expected molecular weight of a monomer (43 or 35 kDa),

whereas TDP-43 in DSG-treated fly tissues except for  $\Delta N$  expression migrates at a speed corresponding to the expected molecular weight of a homodimer (86 kDa). (F) Filter binding assay using biotinylated single-stranded DNA or *in vitro*-transcribed UGGAA repeat RNA (20 repeat units or more) as a substrate for TDP-43 WT and TDP-43 RRM mutant proteins. A nitrocellulose membrane traps proteins including DNA-bound and unbound TDP-43, whereas unbound DNAs are recovered on a nylon membrane. *B*, Here, 6 ng/ $\mu$ L biotinylated UGGAA repeat RNA, 0.1  $\mu$ M biotinylated (TG)12 (*middle*) or biotinylated (AC)12 (*lower*) was mixed with TDP-43 (wild type as well as RRM mutant) at the indicated concentrations. These mixtures were filtered through a nitrocellulose membrane (*left*) overlaid on a nylon membrane (*right*), and nucleic acids trapped on each of the membranes were probed with Streptavidin-HRP.

Figure S3

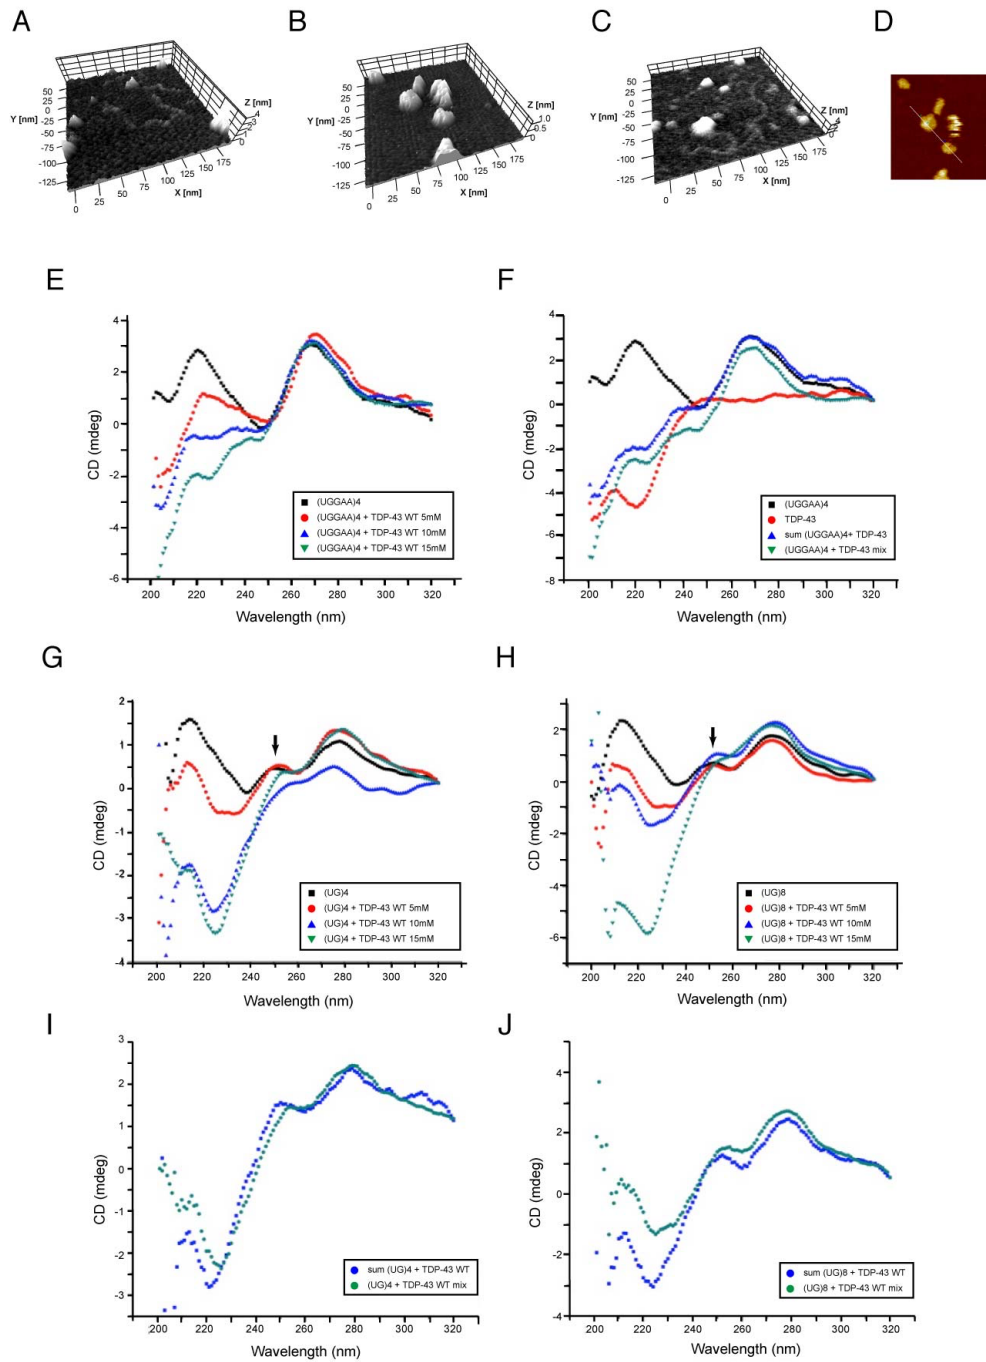

**Figure S3. AFM images of the UGGAA<sub>exp</sub> RNA solution and CD spectra of UGGAA or UG repeat RNA, Related to Figure 4**

(A–C) Representative three-dimensional AFM images of UGGAA<sub>exp</sub> RNAs in solution. Immediately after denaturation of the RNAs, many single-stranded RNAs with an estimated height of approximately 0.9 nm or less were observed (A). However, after 10 min of incubation at room temperature, RNAs tended to form large RNA aggregates with a height of over 2.5 nm (B). In contrast, in the solution with both TDP-43  $\Delta C$  and UGGAA<sub>exp</sub> RNA (C), UGGAA<sub>exp</sub> tended to remain as single strands. (D) Height analysis of UGGAA RNA aggregates in Figure 4F was performed using this image, which is adjusted to a lower intensity for accurate measurement. Scale bars = 50 nm.



**CD spectra of UGGAA or UG repeat RNA**

(E) CD titration of 8  $\mu\text{M}$  (UGGAA)<sub>4</sub> with aliquots of TDP-43 [0 mM (black), 5 mM (red), 10 mM (blue) and 15 mM (green)]. Green plot corresponds to the highest concentration of TDP-43. (F) CD spectra of (UGGAA)<sub>4</sub> alone, TDP-43 alone, the sum of spectra obtained from TDP-43 and (UGGAA)<sub>4</sub> separately and the spectrum obtained from incubating them together corresponding to (UGGAA)<sub>4</sub>+TDP-43 binding. (G) CD titration of 20  $\mu\text{M}$  (UG)<sub>4</sub> and (H) (UG)<sub>8</sub> with aliquots of TDP-43. Green plot corresponds to the highest concentration of TDP-43. (I) The sum of CD spectra obtained from TDP-43 and (UG)<sub>4</sub> separately and the spectrum obtained from incubating them together corresponding to (UG)<sub>4</sub>+TDP-43 binding. (J) The sum of CD spectra obtained from TDP-43 and (UG)<sub>8</sub> separately and the spectrum obtained from incubating them together corresponding to (UG)<sub>8</sub>+TDP-43 binding.

Figure S4

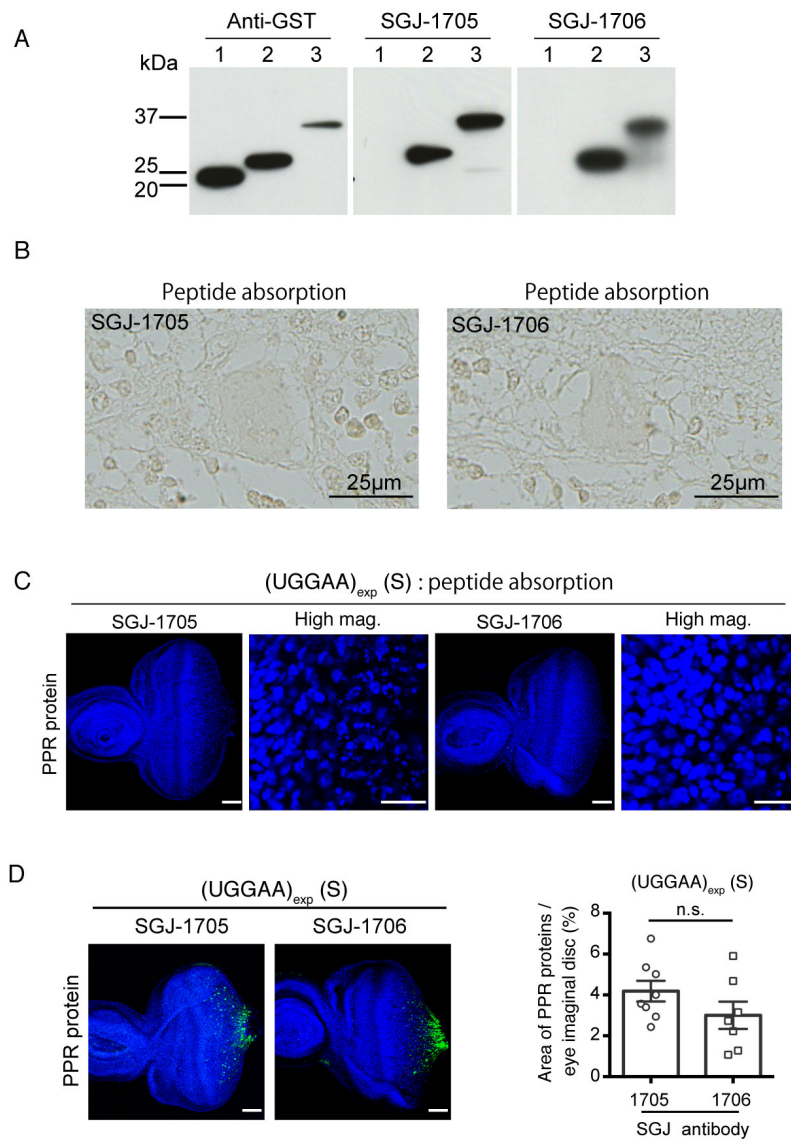

**Figure S4. Characterization of anti-PPR antibodies, Related to Figure 5**

(A) Immunoblot analyses confirmed the specificity of anti-PPR antibodies using recombinant proteins generated in *Escherichia coli*. Lane 1: GST only; lane 2: PPR proteins derived from the (TGGAA)<sub>25</sub> repeat DNA; lane 3: PPR proteins derived from the (TGGAA)<sub>57</sub> repeat DNA. (B–C) The level of PPR proteins detected by the two antibodies diminished upon antigen preabsorption in SCA31 human brain and fly tissue. Scale bars = 50 or 10 µm (high mag.). (D) The PPR proteins were detected in the eye imaginal discs of third-instar (UGGAA)<sub>exp</sub> (S) fly larvae using *GMR-GAL4* by both SGJ-1705 and SGJ-1706 antibodies. No statistically significant difference was observed in the area of PPR proteins detected by the two antibodies. Data are presented as mean ± SEM, n=7-8 per genotype, p=0.1766, two-tailed unpaired Student's t-test, n.s. indicates no significant difference.

## Figure S5

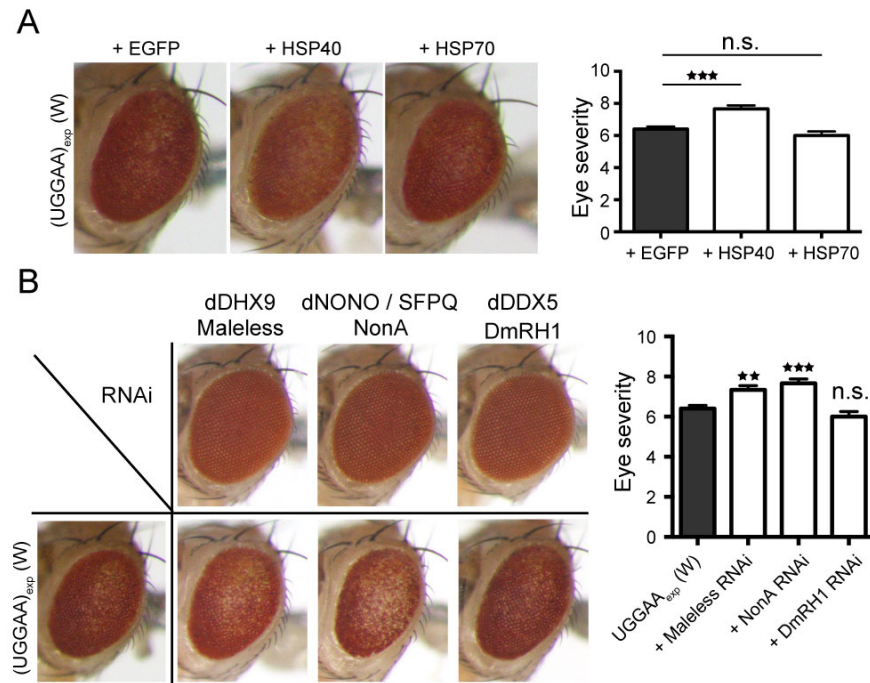

### Figure S5. Molecular chaperones fail to rescue UGGAA<sub>exp</sub>-mediated toxicity, Related to Figure 5

(A) Light microscopy images with eye degeneration scores of the flies of the indicated genotypes (means ± S.E.M.; \* $p < 0.05$ , one-way ANOVA;  $n = 6-8$  per genotype; NS indicates no significant difference). Coexpression of HSP40 and HSP70 did not suppress UGGAA<sub>exp</sub>-mediated toxicity, suggesting that the pathomechanism of UGGAA<sub>exp</sub>-mediated toxicity may differ from that caused by expanded CGG repeats in the FXTAS fly model. (B) Light microscopy images with eye degeneration scores of the flies of the indicated genotypes ( $n=6-10$ ). Data are presented as mean ± SEM,  $p = 0.0001$ , one-way ANOVA, \*\*\* $p = 0.0005$ ,  $p = 0.2915$ , Dunnett's *post hoc* analysis, n.s., not significant.

Depletion of proteins that potentially bind to UGGAA<sub>exp</sub>, such as dDHX9 and dNONO/SFPQ, exacerbated eye degeneration in flies expressing UGGAA<sub>exp</sub>, suggesting that these proteins may also contribute to the pathogenesis of compound eye degeneration. Knockdown of dDDX5 did not cause significant changes in the eye morphology of flies expressing UGGAA<sub>exp</sub> (W). Data are presented as mean ± SEM,  $p < 0.0001$ , one-way ANOVA, \*\* $p = 0.0077$ , \*\*\* $p = 0.0004$ ,  $p = 0.3643$ , Dunnett's *post hoc* analysis, n.s., not significant.

Figure S6

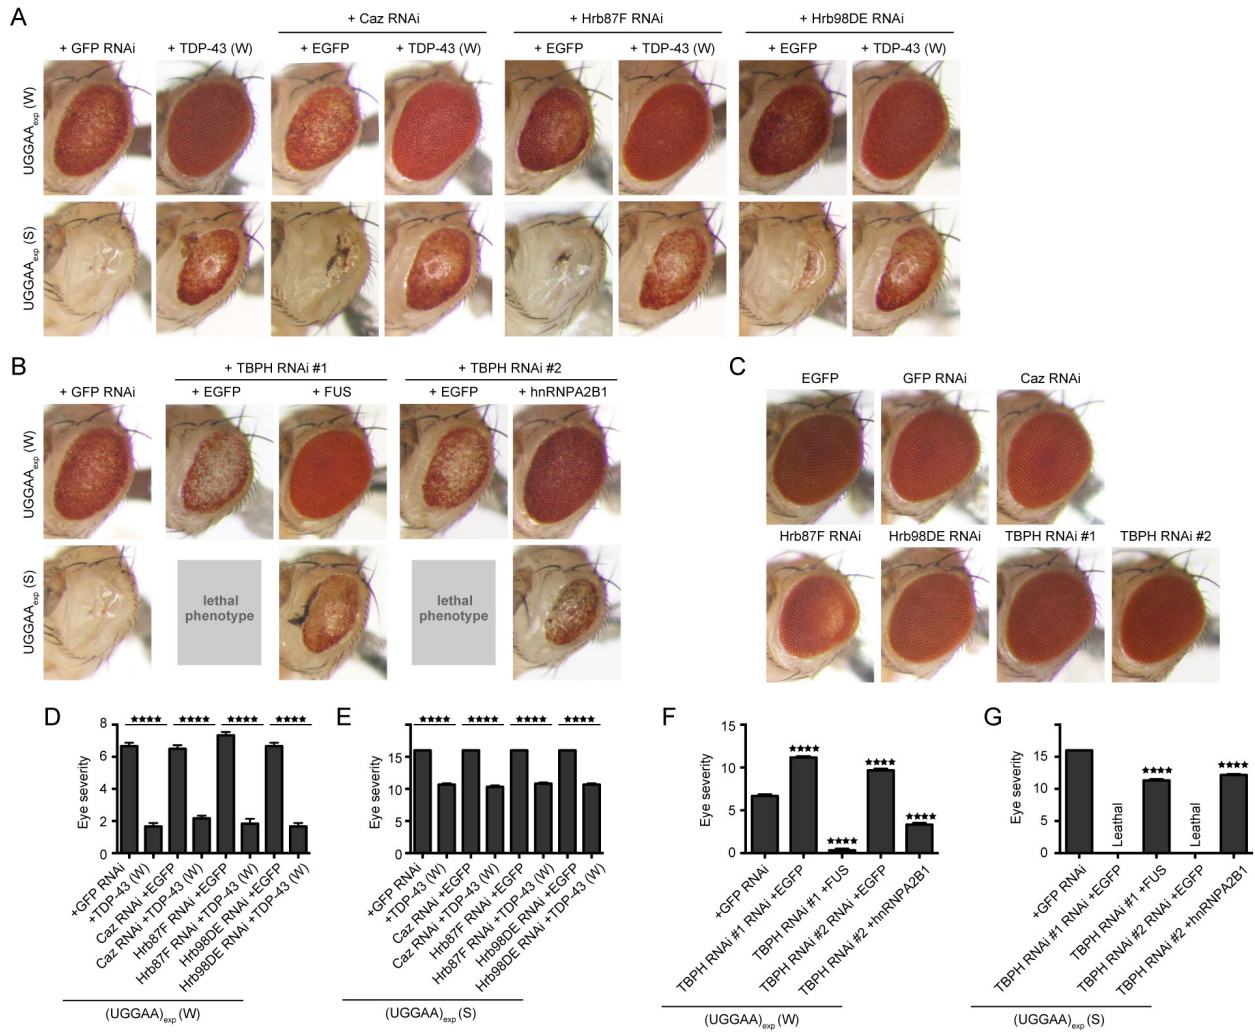

**Figure S6. TDP-43, FUS and hnRNPA2B1 can act independently to suppress UGGAA<sub>exp</sub>-induced toxicity, Related to Figure 6**

(A–C) Representative compound eye images of 1–3-day-old flies of the indicated genotypes. Silencing of Caz, Hrb87F or Hrb98DE did not prevent TDP-43-mediated suppression of UGGAA<sub>exp</sub>-induced toxicity. Likewise, knockdown of TBPH did not affect the FUS- or hnRNPA2B1-mediated suppression of UGGAA<sub>exp</sub>-induced toxicity *in Drosophila*. (D–G) The quantification of eye severity of the indicated fly genotypes (n = 6–10). Data are presented as mean ± SEM, p < 0.0001, one-way ANOVA, \*\*\*\*p < 0.0001, Dunnett's *post hoc* analysis, n.s., not significant.

Figure S7

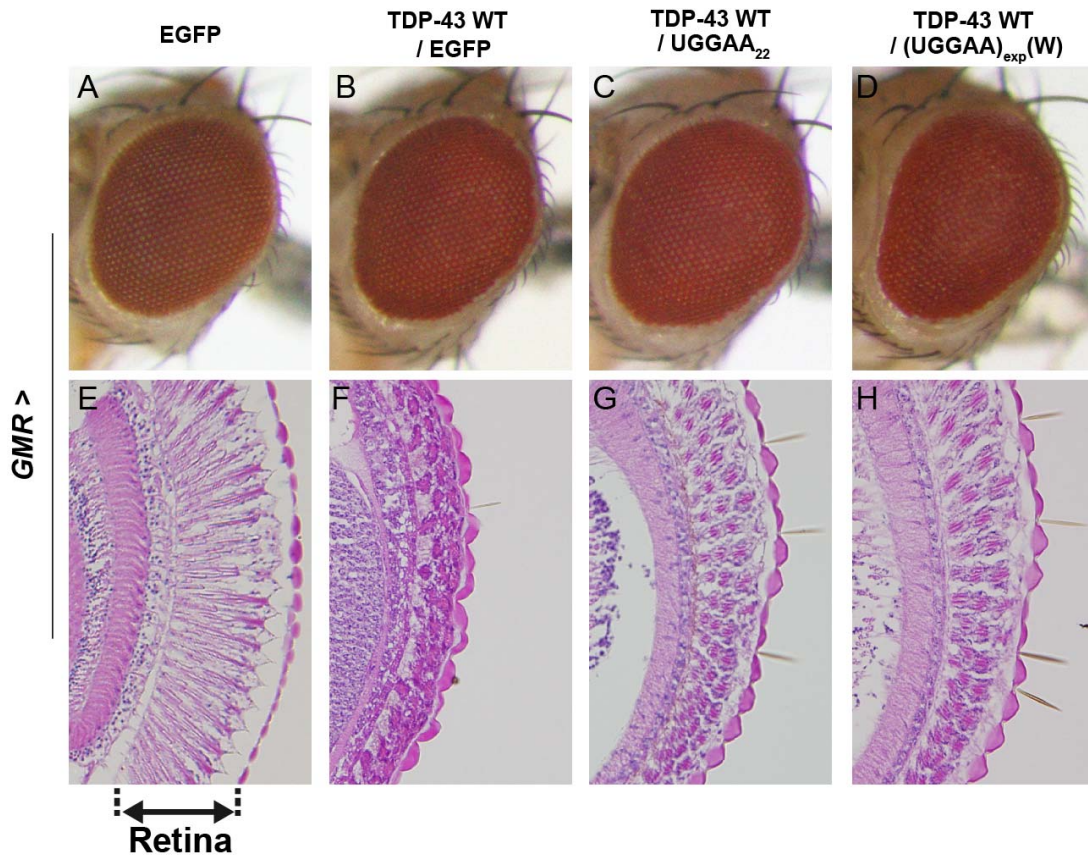

**Figure S7. Beneficial effect of interaction between repetitive UGGAA RNA and TDP-43, Related to Figure 7** (A–D) Representative compound eye images of 1–3-day-old flies of the indicated genotypes. (E–H) Retinal cryosections of eyes of 1–3-day-old flies. TDP-43 WT expression in *Drosophila* by the eye-specific GMR-GAL4 driver causes thinning of the retina (F). However, coexpression of nontoxic short UGGAA, UGGAA22 (G) or relatively low-level expression of long UGGAA (H) leads to the restoration of retinal thickness in compound eyes.

**Table S1. Fly Phenotypes, Related to Figure 1**

| Fly line<br>Driver line                                                                   | Weak<br>(Line 2)                  | Strong<br>(Line 1, 6)                                               | Lethal<br>(Line 4, 5) | Short repeat<br>(Line 3) |
|-------------------------------------------------------------------------------------------|-----------------------------------|---------------------------------------------------------------------|-----------------------|--------------------------|
| <i>GMR-GAL4</i><br>(eye and other tissues<br>including brain, trachea,<br>and wing discs) | Rough eye<br>Loss of pigmentation | Severe degeneration<br>and loss of pigmentation<br>Pupa semi-lethal | Pupa lethal           | Normal                   |
| <i>ELAV-GAL4</i><br>(all neuronal cells)                                                  | Short life span                   | Pupa lethal                                                         | Pupa lethal           | Normal                   |



**Table S2. Identification of Proteins Associated with Expanded UGGAA Repeats, Related to Figure 2**

| Accession | Description                                                                      | Score  | Coverage | # Peptides | # PSM | # AAs | MW [kDa] | calc. pI |
|-----------|----------------------------------------------------------------------------------|--------|----------|------------|-------|-------|----------|----------|
| Q9D0E1    | Heterogeneous nuclear ribonucleoprotein M [HNRPM_MOUSE]                          | 614.77 | 34.16    | 21         | 150   | 729   | 77.6     | 8.63     |
| O35737    | Heterogeneous nuclear ribonucleoprotein H [HNRH1_MOUSE]                          | 566.30 | 46.99    | 14         | 115   | 449   | 49.2     | 6.30     |
| P70333    | Heterogeneous nuclear ribonucleoprotein H2 [HNRH2_MOUSE]                         | 535.12 | 46.99    | 13         | 106   | 449   | 49.2     | 6.30     |
| P09405    | Nucleolin [NUCL_MOUSE]                                                           | 365.78 | 29.84    | 22         | 80    | 707   | 76.7     | 4.75     |
| Q8R081    | Heterogeneous nuclear ribonucleoprotein L [HNRPL_MOUSE]                          | 361.80 | 34.30    | 13         | 81    | 586   | 63.9     | 8.10     |
| Q8C854    | Myelin expression factor 2 [MYEF2_MOUSE]                                         | 287.99 | 29.27    | 16         | 74    | 591   | 63.3     | 8.87     |
| P42669    | Transcriptional activator protein Pur-alpha [PURA_MOUSE]                         | 265.77 | 41.43    | 9          | 50    | 321   | 34.9     | 6.44     |
| O88569    | Heterogeneous nuclear ribonucleoproteins A2/B1 [ROA2_MOUSE]                      | 256.36 | 29.46    | 10         | 52    | 353   | 37.4     | 8.95     |
| Q921F2    | TAR DNA-binding protein 43 [TABDP_MOUSE]                                         | 251.17 | 33.57    | 10         | 56    | 414   | 44.5     | 6.70     |
| Q8VEK3    | Heterogeneous nuclear ribonucleoprotein U [HNRPU_MOUSE]                          | 217.95 | 21.75    | 14         | 43    | 800   | 87.9     | 6.24     |
| Q91VM5    | Heterogeneous nuclear ribonucleoprotein G-like 1 [RBMXL_MOUSE]                   | 188.02 | 22.16    | 9          | 44    | 388   | 42.1     | 9.99     |
| P56959    | RNA-binding protein FUS [FUS_MOUSE]                                              | 181.97 | 12.36    | 8          | 42    | 518   | 52.6     | 9.36     |
| Q8BG05    | Heterogeneous nuclear ribonucleoprotein A3 [ROA3_MOUSE]                          | 165.92 | 30.61    | 15         | 34    | 379   | 39.6     | 9.01     |
| O35295    | Transcriptional activator protein Pur-beta [PURB_MOUSE]                          | 148.48 | 42.28    | 9          | 29    | 324   | 33.9     | 5.43     |
| Q8VIJ6    | Splicing factor, proline- and glutamine-rich [SFPQ_MOUSE]                        | 147.89 | 17.60    | 9          | 32    | 699   | 75.4     | 9.44     |
| Q60668    | Heterogeneous nuclear ribonucleoprotein D0 [HNRPD_MOUSE]                         | 139.83 | 23.38    | 10         | 31    | 355   | 38.3     | 7.81     |
| Q922X1    | Heterogeneous nuclear ribonucleoprotein F [HNRPF_MOUSE]                          | 138.90 | 28.92    | 6          | 28    | 415   | 45.7     | 5.49     |
| Q99K48    | Non-POU domain-containing octamer-binding protein [NONO_MOUSE]                   | 116.01 | 32.14    | 8          | 28    | 473   | 54.5     | 8.95     |
| Q91VR5    | ATP-dependent RNA helicase DDX1 [DDX1_MOUSE]                                     | 110.76 | 36.62    | 18         | 24    | 740   | 82.4     | 7.21     |
| Q7TMK9    | Heterogeneous nuclear ribonucleoprotein Q [HNRPQ_MOUSE]                          | 108.79 | 24.08    | 11         | 26    | 623   | 69.6     | 8.59     |
| P49312    | Heterogeneous nuclear ribonucleoprotein A1 [ROA1_MOUSE]                          | 91.87  | 25.00    | 6          | 20    | 320   | 34.2     | 9.23     |
| Q91W50    | Cold shock domain-containing protein E1 [CSDE1_MOUSE]                            | 84.69  | 18.17    | 10         | 18    | 798   | 88.7     | 6.37     |
| Q8VHK9    | Probable ATP-dependent RNA helicase DHX36 [DHX36_MOUSE]                          | 83.61  | 16.78    | 11         | 18    | 1001  | 113.8    | 8.41     |
| Q7TMM9    | Tubulin beta-2A chain [TBB2A_MOUSE]                                              | 78.50  | 45.17    | 13         | 18    | 445   | 49.9     | 4.89     |
| O35286    | Putative pre-mRNA-splicing factor ATP-dependent RNA helicase DHX15 [DHX15_MOUSE] | 76.47  | 20.75    | 13         | 18    | 795   | 90.9     | 7.46     |
| P99024    | Tubulin beta-5 chain [TBB5_MOUSE]                                                | 73.87  | 49.10    | 13         | 17    | 444   | 49.6     | 4.89     |
| Q8VDM6    | Heterogeneous nuclear ribonucleoprotein U-like protein 1 [HNRL1_MOUSE]           | 72.39  | 18.04    | 8          | 13    | 859   | 95.9     | 6.58     |
| Q9ERD7    | Tubulin beta-3 chain [TBB3_MOUSE]                                                | 68.86  | 27.56    | 9          | 16    | 450   | 50.4     | 4.93     |
| Q6NVF9    | Cleavage and polyadenylation specificity factor subunit 6 [CPSF6_MOUSE]          | 66.76  | 15.06    | 6          | 13    | 551   | 59.1     | 7.15     |
| P47857    | 6-phosphofructokinase, muscle type [K6PF_MOUSE]                                  | 64.50  | 19.62    | 11         | 13    | 780   | 85.2     | 8.00     |
| P11798    | Calcium/calmodulin-dependent protein kinase type II subunit alpha [KCC2A_MOUSE]  | 64.14  | 22.18    | 7          | 14    | 478   | 54.1     | 7.08     |
| Q6IFX2    | Keratin, type I cytoskeletal 42 [KIC42_MOUSE]                                    | 63.75  | 9.29     | 3          | 15    | 452   | 50.1     | 5.16     |
| P32067    | Lupus La protein homolog [LA_MOUSE]                                              | 62.95  | 28.43    | 9          | 14    | 415   | 47.7     | 9.77     |
| Q8R326    | Paraspeckle component 1 [PSPC1_MOUSE]                                            | 57.22  | 20.27    | 6          | 11    | 523   | 58.7     | 6.67     |
| P24547    | Inosine-5'-monophosphate dehydrogenase 2 [IMDH2_MOUSE]                           | 52.82  | 22.76    | 10         | 11    | 514   | 55.8     | 7.28     |
| Q6PDM2    | Serine/arginine-rich splicing factor 1 [SRSF1_MOUSE]                             | 51.76  | 32.66    | 8          | 14    | 248   | 27.7     | 10.36    |
| Q9CQF3    | Cleavage and polyadenylation specificity factor subunit 5 [CPSF5_MOUSE]          | 49.58  | 39.21    | 6          | 10    | 227   | 26.2     | 8.82     |
| Q9WUA3    | 6-phosphofructokinase type C [K6PP_MOUSE]                                        | 47.38  | 17.73    | 8          | 9     | 784   | 85.4     | 7.11     |
| Q9JIK5    | Nucleolar RNA helicase 2 [DDX21_MOUSE]                                           | 45.08  | 15.63    | 9          | 11    | 851   | 93.5     | 9.11     |
| Q99020    | Heterogeneous nuclear ribonucleoprotein A/B [ROAA_MOUSE]                         | 44.11  | 15.79    | 5          | 11    | 285   | 30.8     | 7.91     |
| P28652    | Calcium/calmodulin-dependent protein kinase type II subunit beta [KCC2B_MOUSE]   | 41.16  | 18.27    | 6          | 9     | 542   | 60.4     | 7.28     |
| Q99LF4    | tRNA-splicing ligase RtcB homolog [RTCB_MOUSE]                                   | 40.91  | 20.59    | 8          | 10    | 505   | 55.2     | 7.23     |
| Q9Z130    | Heterogeneous nuclear ribonucleoprotein D-like [HNRLD_MOUSE]                     | 39.54  | 26.25    | 7          | 9     | 301   | 33.5     | 7.31     |
| Q9Z1M3    | Splicing factor 3B subunit 3 [SF3B3_MOUSE]                                       | 39.07  | 8.46     | 7          | 9     | 1217  | 135.5    | 5.26     |
| Q497V5    | S1 RNA-binding domain-containing protein 1 [SRBD1_MOUSE]                         | 36.49  | 7.68     | 6          | 9     | 1015  | 114.0    | 8.78     |
| Q9JJ43    | RNA binding protein fox-1 homolog 1 [RFOX1_MOUSE]                                | 36.33  | 11.11    | 3          | 8     | 396   | 42.7     | 6.86     |
| P16381    | Putative ATP-dependent RNA helicase P10/DDX3L_MOUSE]                             | 35.40  | 10.91    | 6          | 8     | 660   | 73.1     | 7.18     |
| Q00P19    | Heterogeneous nuclear ribonucleoprotein U-like protein 2 [HNRL2_MOUSE]           | 32.93  | 8.32     | 6          | 7     | 745   | 84.9     | 4.89     |
| Q9DBR1    | 5'-3' exonuclease 2 [XRN2_MOUSE]                                                 | 32.25  | 7.78     | 5          | 8     | 951   | 108.6    | 7.59     |
| P60824    | Cold-inducible RNA-binding protein [CIRBP_MOUSE]                                 | 31.71  | 27.91    | 3          | 6     | 172   | 18.6     | 9.61     |
| P62960    | Nuclease-sensitive element-binding protein 1 [YBOX1_MOUSE]                       | 30.44  | 29.50    | 4          | 5     | 322   | 35.7     | 9.88     |
| Q8BYK6    | YTH domain family protein 3 [YTHD3_MOUSE]                                        | 30.08  | 8.03     | 3          | 7     | 585   | 63.9     | 9.04     |
| Q9Z122    | Serine-threonine kinase receptor-associated protein [STRAP_MOUSE]                | 29.52  | 18.86    | 4          | 6     | 350   | 38.4     | 5.12     |
| Q9CQ88    | UPF0568 protein C14orf166 homolog [CN166_MOUSE]                                  | 29.18  | 36.48    | 6          | 7     | 244   | 28.1     | 6.89     |
| P62996    | Transformer-2 protein homolog beta [TRA2B_MOUSE]                                 | 28.91  | 10.42    | 2          | 6     | 288   | 33.6     | 11.25    |
| Q8C5Q4    | G-rich sequence factor 1 [GRSF1_MOUSE]                                           | 28.45  | 13.57    | 4          | 6     | 479   | 53.0     | 6.67     |
| Q3U0V1    | Far upstream element-binding protein 2 [FUBP2_MOUSE]                             | 27.97  | 11.63    | 5          | 7     | 748   | 76.7     | 7.33     |
| P63017    | Heat shock cognate 71 kDa protein [HSP7C_MOUSE]                                  | 26.66  | 11.61    | 5          | 6     | 646   | 70.8     | 5.52     |
| Q6P3D0    | U8 snRNA-decapping enzyme [NUD16_MOUSE]                                          | 25.96  | 27.69    | 5          | 6     | 195   | 21.8     | 7.12     |
| Q6A0A9    | Constitutive coactivator of PPAR-gamma-like protein 1 [F120A_MOUSE]              | 25.75  | 8.09     | 6          | 6     | 1112  | 121.6    | 8.92     |
| Q8BIF2    | RNA binding protein fox-1 homolog 3 [RFOX3_MOUSE]                                | 24.44  | 13.10    | 3          | 5     | 374   | 40.6     | 7.90     |
| Q61656    | Probable ATP-dependent RNA helicase DDX5 [DDX5_MOUSE]                            | 23.77  | 7.82     | 4          | 6     | 614   | 69.2     | 8.92     |
| Q9CZU3    | Superkiller viralicidic activity 2-like 2 [SK2L2_MOUSE]                          | 23.52  | 6.92     | 6          | 6     | 1040  | 117.6    | 6.40     |
| Q9DBC3    | Cap-specific mRNA (nucleoside-2'-O-)-methyltransferase 1 [MTR1_MOUSE]            | 23.23  | 7.89     | 4          | 5     | 837   | 95.6     | 7.27     |
| P12382    | 6-phosphofructokinase, liver type [K6PL_MOUSE]                                   | 23.23  | 7.05     | 4          | 5     | 780   | 85.3     | 7.17     |
| Q60865    | Caprin-1 [CAPR1_MOUSE]                                                           | 22.92  | 13.01    | 4          | 5     | 707   | 78.1     | 5.25     |
| Q8BTV2    | Cleavage and polyadenylation specificity factor subunit 7 [CPSF7_MOUSE]          | 22.32  | 7.64     | 2          | 4     | 471   | 52.0     | 8.00     |
| P62482    | Voltage-gated potassium channel subunit beta-2 [KCAB2_MOUSE]                     | 21.96  | 17.44    | 4          | 5     | 367   | 41.0     | 9.00     |
| Q6P5D3    | Putative ATP-dependent RNA helicase DHX57 [DHX57_MOUSE]                          | 21.31  | 5.62     | 5          | 5     | 1388  | 155.7    | 7.87     |
| Q3TJZ6    | Protein FAM98A [FA98A_MOUSE]                                                     | 20.97  | 9.51     | 4          | 4     | 515   | 55.0     | 8.95     |
| Q8R3C6    | Probable RNA-binding protein 19 [RBM19_MOUSE]                                    | 20.64  | 7.25     | 5          | 5     | 952   | 106.0    | 6.57     |
| Q6PHZ2    | Calcium/calmodulin-dependent protein kinase type II subunit delta [KCC2D_MOUSE]  | 20.57  | 11.22    | 4          | 5     | 499   | 56.3     | 7.25     |
| Q6VHN8    | Protein syndesmos [SDOS_MOUSE]                                                   | 20.45  | 29.38    | 5          | 5     | 211   | 23.4     | 9.26     |
| P53996    | Cellular nucleic acid-binding protein [CNBP_MOUSE]                               | 20.33  | 28.65    | 3          | 4     | 178   | 19.6     | 7.58     |
| Q99104    | Myosin-Va [MYO5A_MOUSE]                                                          | 19.12  | 2.59     | 3          | 4     | 1853  | 215.4    | 8.63     |
| P62242    | 40S ribosomal protein S8 [RS8_MOUSE]                                             | 18.74  | 26.44    | 4          | 4     | 208   | 24.2     | 10.32    |
| Q8BHN5    | RNA-binding protein 45 [RBM45_MOUSE]                                             | 18.62  | 9.24     | 3          | 4     | 476   | 53.3     | 7.69     |
| Q9D6Z1    | Nucleolar protein 56 [NOP56_MOUSE]                                               | 18.00  | 10.69    | 4          | 4     | 580   | 64.4     | 9.14     |
| P16858    | Glyceraldehyde-3-phosphate dehydrogenase [G3P_MOUSE]                             | 17.75  | 20.72    | 4          | 4     | 333   | 35.8     | 8.25     |
| Q99JX7    | Nuclear RNA export factor 1 [NXF1_MOUSE]                                         | 15.58  | 7.44     | 3          | 3     | 618   | 70.3     | 8.73     |
| Q9JII5    | DAZ-associated protein 1 [DAZP1_MOUSE]                                           | 15.45  | 11.58    | 3          | 3     | 406   | 43.2     | 8.56     |
| Q8K310    | Matrin-3 [MATR3_MOUSE]                                                           | 15.32  | 6.62     | 3          | 3     | 846   | 94.6     | 6.25     |
| Q8C2Q3    | RNA-binding protein 14 [RBM14_MOUSE]                                             | 15.04  | 8.22     | 3          | 3     | 669   | 69.4     | 9.67     |
| Q8CCS6    | Polyadenylate-binding protein 2 [PABP2_MOUSE]                                    | 14.71  | 8.28     | 2          | 4     | 302   | 32.3     | 5.17     |
| Q9CYR0    | Single-stranded DNA-binding protein, mitochondrial [SSBP_MOUSE]                  | 14.24  | 19.74    | 2          | 3     | 152   | 17.3     | 9.92     |
| P29341    | Polyadenylate-binding protein 1 [PABP1_MOUSE]                                    | 14.22  | 7.55     | 3          | 3     | 636   | 70.6     | 9.50     |
| P11276    | Fibronectin [FINC_MOUSE]                                                         | 13.92  | 2.06     | 3          | 3     | 2477  | 272.3    | 5.59     |
| Q8BZ23    | NEDD4-like E3 ubiquitin-protein ligase WWP1 [WWP1_MOUSE]                         | 13.55  | 4.58     | 3          | 3     | 918   | 104.6    | 6.38     |
| Q61510    | E3 ubiquitin/ISG15 ligase TRIM25 [TRIM25_MOUSE]                                  | 13.46  | 4.42     | 2          | 3     | 634   | 71.7     | 8.28     |
| Q9ESX5    | H/ACA ribonucleoprotein complex subunit 4 [DKC1_MOUSE]                           | 13.15  | 9.43     | 3          | 3     | 509   | 57.4     | 9.28     |
| P50096    | Inosine-5'-monophosphate dehydrogenase 1 [IMDH1_MOUSE]                           | 12.92  | 7.78     | 3          | 3     | 514   | 55.2     | 6.80     |
| O88532    | Zinc finger RNA-binding protein [ZFR_MOUSE]                                      | 12.24  | 2.79     | 2          | 3     | 1074  | 116.8    | 9.04     |
| P98086    | Complement C1q subcomponent subunit A [C1QA_MOUSE]                               | 11.82  | 13.88    | 2          | 3     | 245   | 26.0     | 9.11     |
| Q91W39    | Nuclear receptor coactivator 5 [NCOA5_MOUSE]                                     | 11.82  | 8.12     | 2          | 2     | 579   | 65.3     | 9.82     |
| Q8BL97    | Serine/arginine-rich splicing factor 7 [SRSF7_MOUSE]                             | 11.66  | 11.61    | 2          | 3     | 267   | 30.8     | 11.90    |
| O70133    | ATP-dependent RNA helicase A [DHX9_MOUSE]                                        | 11.22  | 2.75     | 3          | 3     | 1380  | 149.4    | 6.83     |
| P62908    | 40S ribosomal protein S3 [RS3_MOUSE]                                             | 10.99  | 16.87    | 3          | 3     | 243   | 26.7     | 9.66     |
| Q61545    | RNA-binding protein EWS [EWS_MOUSE]                                              | 10.99  | 4.43     | 2          | 3     | 655   | 68.4     | 9.33     |

#: Number, PSM: peptide-spectrum match, AA: amino acid, MW: molecular weight

**Table S3. *Drosophila* Genotypes Used in this Study, Related to Experimental Procedures**
